# Supplementary material for: Systematically attenuating DNA targeting enables CRISPR-driven editing in bacteria
Source: PubMed Central journal article supplement (PMC9908933; doi:10.1038/s41467-023-36283-9), 2023-02-08
Supplement: 41467_2023_36283_MOESM4_ESM.pdf [file 41467_2023_36283_MOESM4_ESM.pdf]

**Title: Supplementary Data 1.**

**Description:** Strains, plasmids, and oligos used in this work.
